# Supplementary material
Source: publisher site journal article supplement (https://www.dovepress.com/get_supplementary_file.php?f=418176.docx)
Supplement: Supplementary file 1 [file get_supplementary_file.php]

**Supplementary Table 1 The comparison of clinical information between Normal_control and sepsis patients**

|  | Normal_control (n=7) | Case (n=8) | p value |
| --- | --- | --- | --- |
| Age, mean (SD) | 42.14 (19.39) | 51.75 (17.73) | 0.334 |
| Sex, Male (%) | 6 ( 85.7) | 5 ( 62.5) | 0.668 |
| Family_history, No (%) | 7 (100.0) | 8 (100.0) | NA |
| Body_temperature, mean (SD) | 36.63 (0.40) | 38.84 (0.69) | <0.001 |
| SBP, mean (SD) | 125.00 (9.43) | 148.75 (18.90) | 0.01 |
| DBP, mean (SD) | 80.86 (6.09) | 90.62 (7.41) | 0.016 |
| Heart_rate_per_minute, mean (SD) | 78.14 (7.17) | 99.50 (5.58) | <0.001 |
| Blood_glucose, mean (SD) | 4.81 (0.42) | 6.20 (2.39) | 0.157 |
| Respiratory_rate_per_minute, mean (SD) | 21.14 (1.21) | 25.62 (2.20) | <0.001 |
| Hemameba, mean (SD) | 6.86 (1.09) | 17.54 (2.94) | <0.001 |
| Plasma_c_reactive_protein, mean (SD) | NaN (NA) | 67.11 (21.17) | NA |
| Organ_dysfunction, No (%) | 7 (100.0) | 8 (100.0) | NA |
| Other_complications, No (%) | 7 (100.0) | 8 (100.0) | NA |
